# Supplementary material for: Heading towards novel superior silicon-based lithium-ion batteries: ultrasmall nanoclusters top-down dispersed over synthetic graphite flakes as binary hybrid anodes
Source: Royal Society of Chemistry journal article supplement (doi:10.1039/c5ta03722k), 2015-01-01
Supplement: c5ta03722k1.pdf [file c5ta03722k1.pdf]

## Supporting Data

**Figure A.1.** (A) Anodic etching processes for obtaining etched-Si with frameworks in ultranano scale. (B) The top view of etched-Si flakes (C) The bottom view of etched-Si flakes.

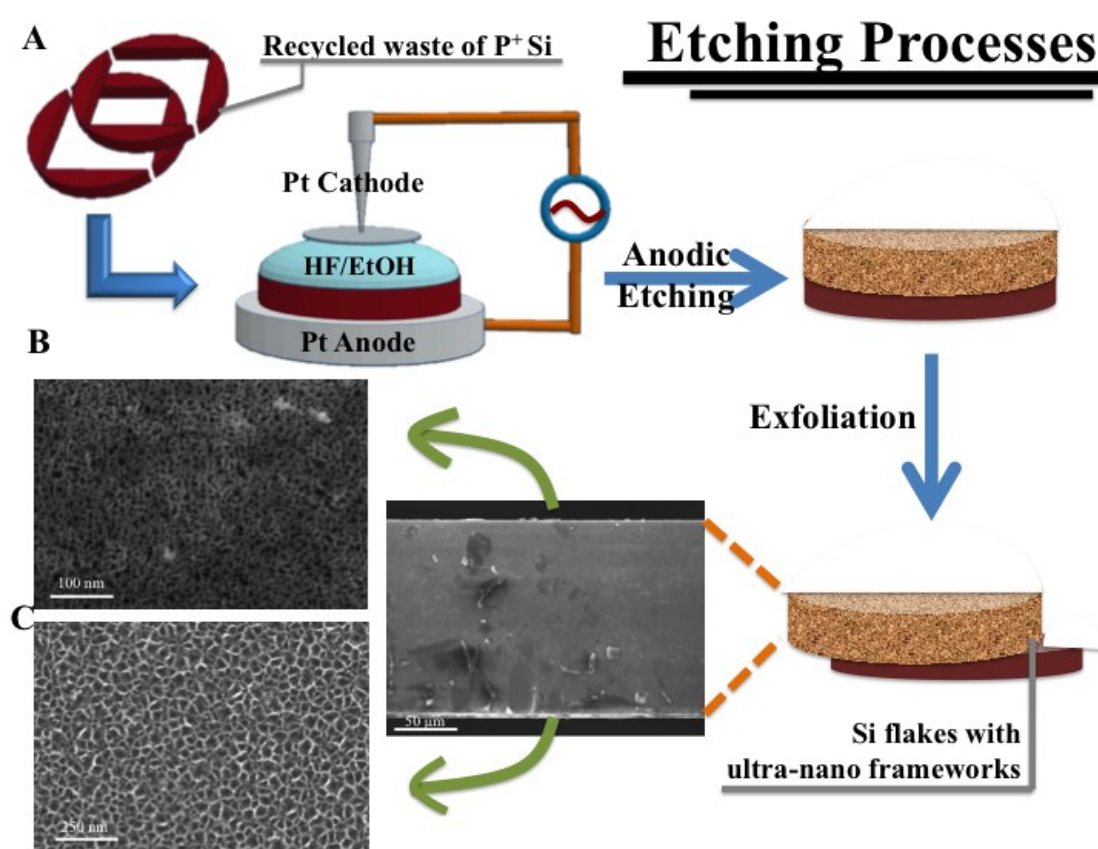

**Figure A.2.** (A) The full XPS spectrum of SiUPs. (B) The high-resolution scanning spectra of O 1s core-level XPS SiUPs.

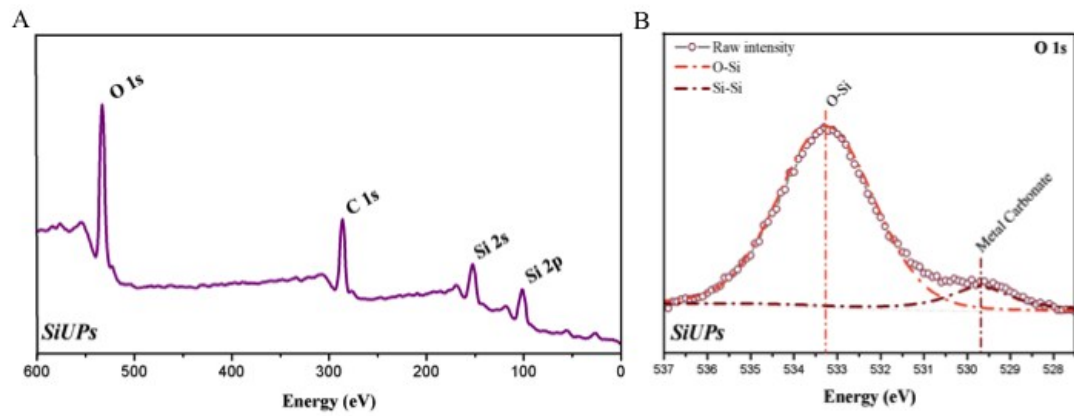

**Figure A.3.** (A) Optical images of SiUPs, r-Si, and c-Si. (B) The high-resolution O 1s XPS spectrum of SiUPs.

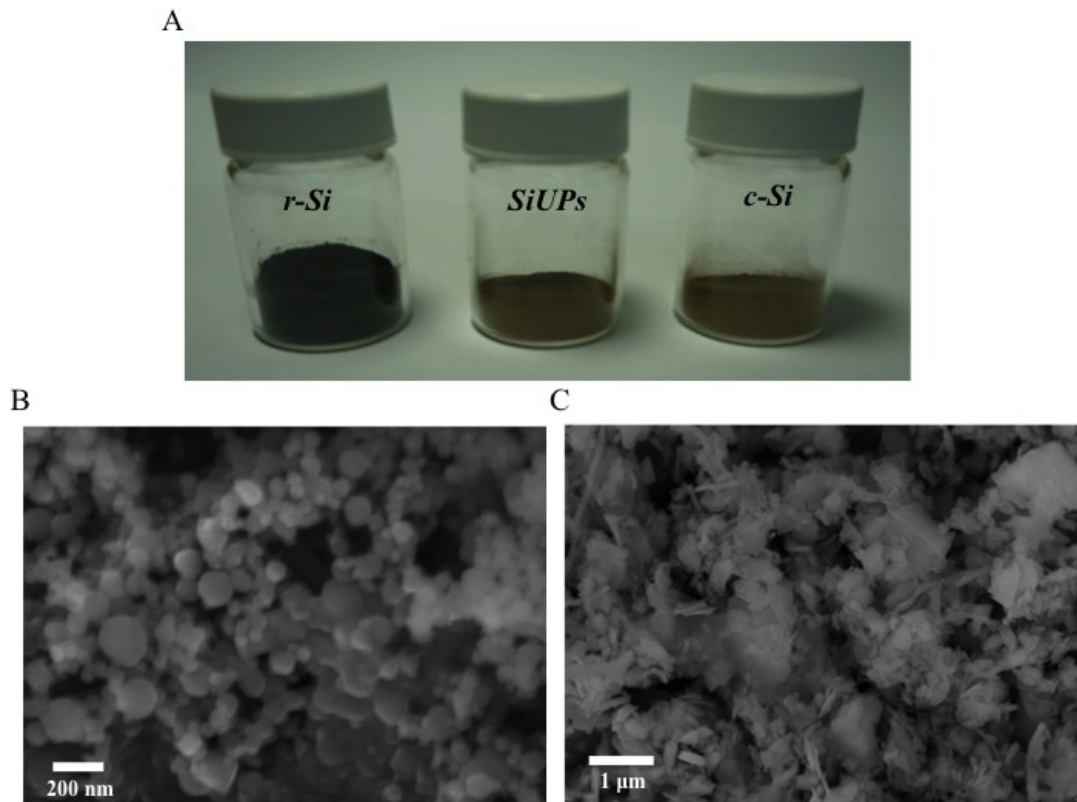

**Figure A.4.** TEM images of TD-SiUPs-31 and m-SiUPs

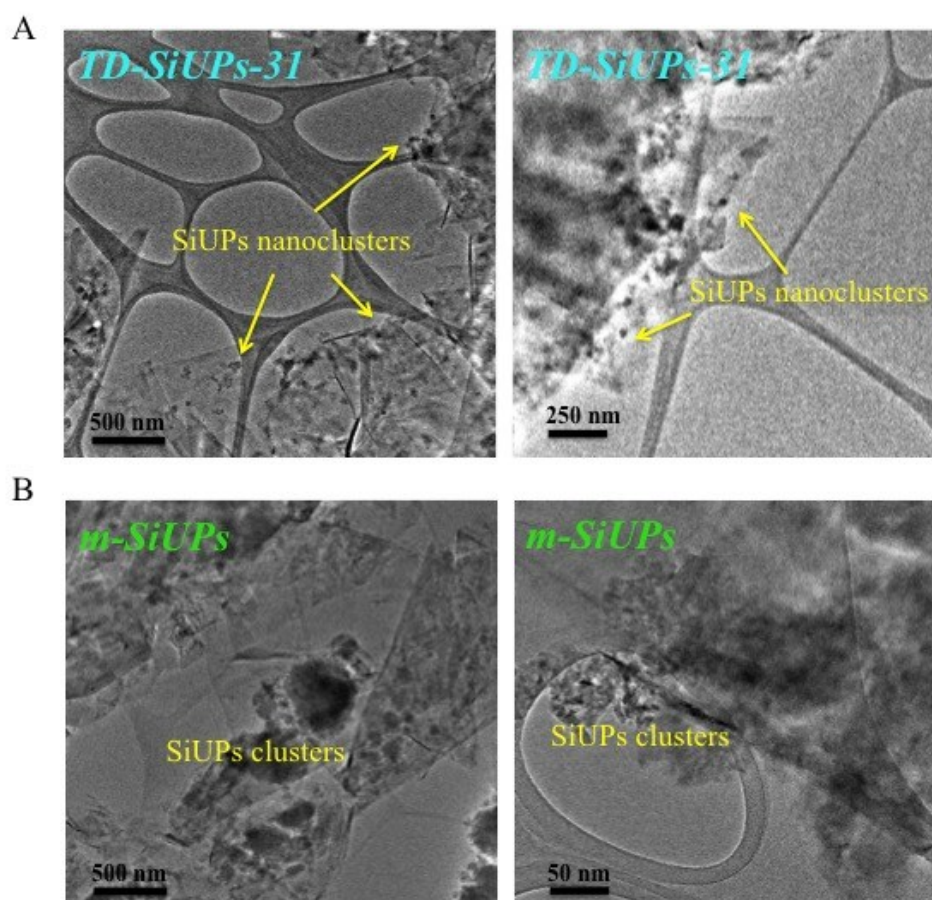

**Figure A.5.** Low-magnification SEM images of TD-SiUPs-31 and m-SiUPs.

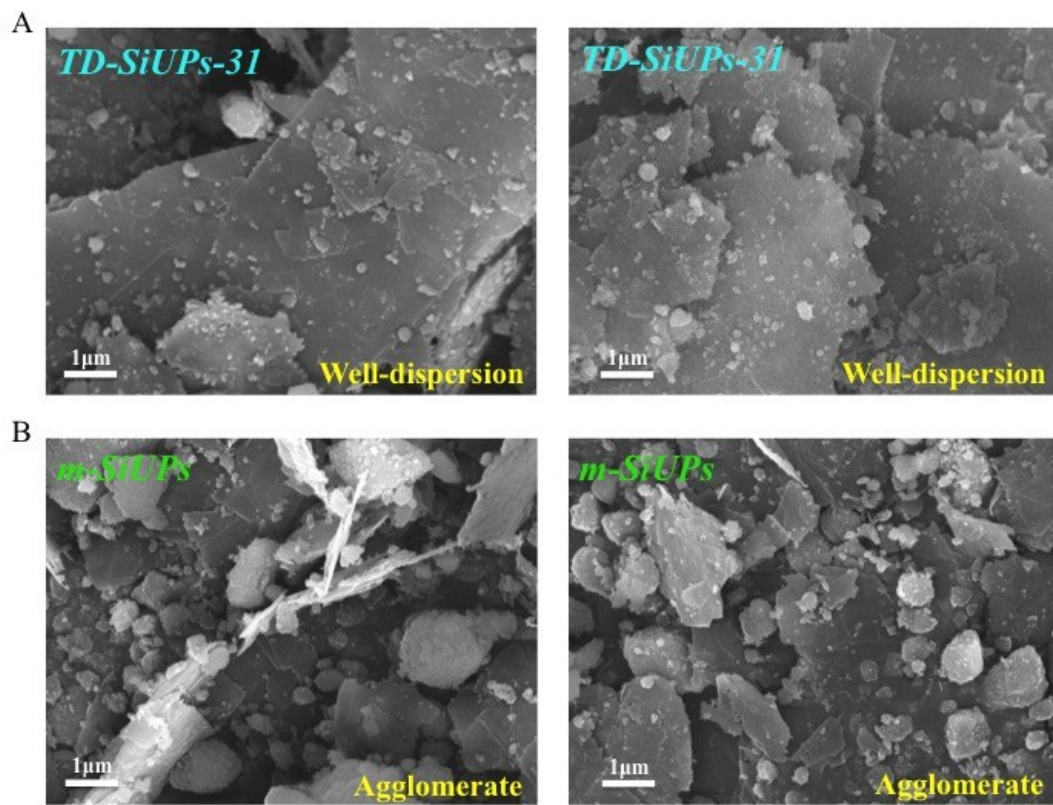

**Figure A.6.** BET analysis of TD-SiUPs-31 and m-SiUPs.

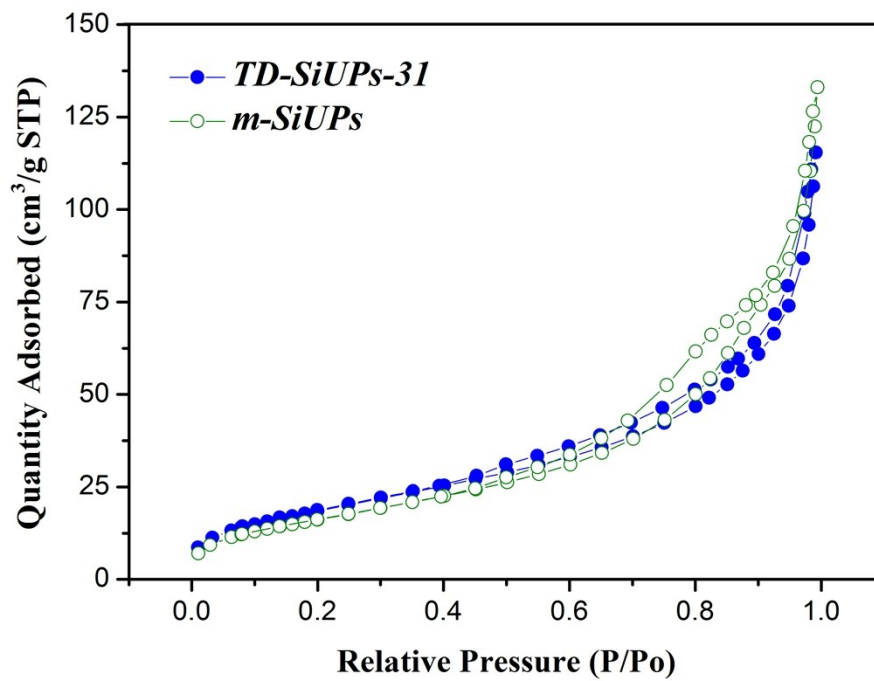

**Figure A.7.** (A) Cycling performance of graphitic flakes at two current densities of 0.2 and 0.8 A g<sup>-1</sup> for 100 cycles. (B) The rate performance of graphitic flakes at different current densities.

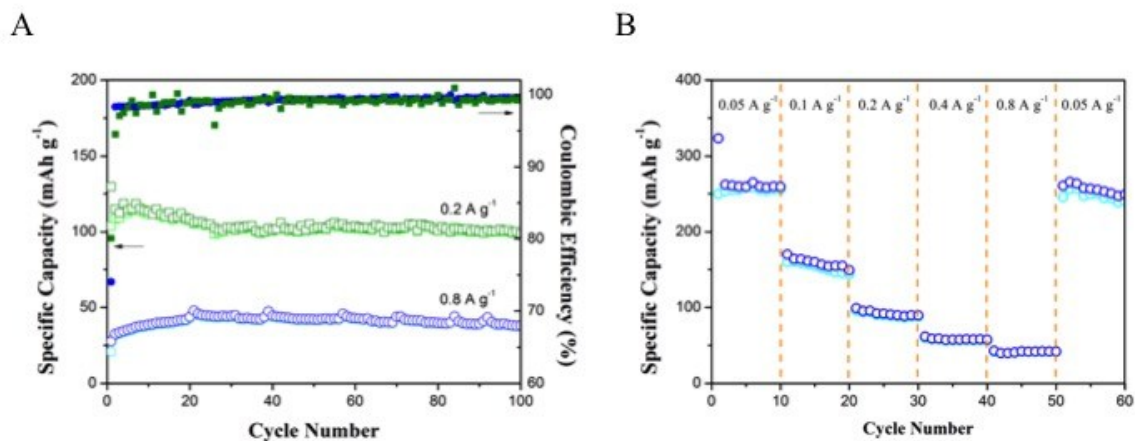

**Figure A.8.** Exhibited Coulombic efficiency of (A) TD-SiUPs-11 and (B) TD-SiUPs-23.

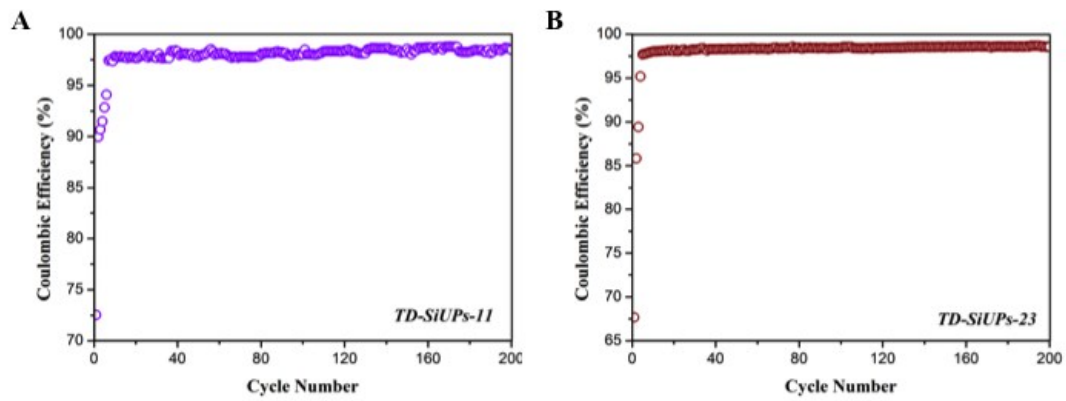



**Table A.1.** The summary of characteristics for SiUPs, c-SiNPs, and r-SiNPs.

| Sample  | Diameters [nm] | 100 <sup>th</sup> cycle discharged capacity [mAh g <sup>-1</sup> ] | Capacity retention after 100 cycles [%] | Cost |
|---------|----------------|--------------------------------------------------------------------|-----------------------------------------|------|
| SiUPs   | <10            | 602.3                                                              | 19.94                                   | Low  |
| c-SiNPs | 40~200         | 31.2                                                               | 1.02                                    | High |
| r-SiNPs | 50~1000        | 18.7                                                               | 0.74                                    | Low  |
